# Supplementary material
Source: publisher figshare collection journal article supplement (https://sage.figshare.com/ndownloader/files/21080952)
Supplement: Supplementary file 1 [file 21080952]

#### Chi-Square Tests

|                                    | Value              | df | Asymp. Sig. (2-sided) | Exact Sig. (2-sided) | Exact Sig. (1-sided) |
|------------------------------------|--------------------|----|-----------------------|----------------------|----------------------|
| Pearson Chi-Square                 | 4,762 <sup>a</sup> | 1  | ,029                  |                      |                      |
| Continuity Correction <sup>b</sup> | 3,586              | 1  | ,058                  |                      |                      |
| Likelihood Ratio                   | 4,575              | 1  | ,032                  |                      |                      |
| Fisher's Exact Test                |                    |    |                       | ,042                 | ,031                 |
| Linear-by-Linear Association       | 4,734              | 1  | ,030                  |                      |                      |
| N of Valid Cases                   | 169                |    |                       |                      |                      |

Coppi 2009

#### Chi-Square Tests

|                                    | Value               | df | Asymp. Sig. (2-sided) | Exact Sig. (2-sided) | Exact Sig. (1-sided) |
|------------------------------------|---------------------|----|-----------------------|----------------------|----------------------|
| Pearson Chi-Square                 | 44,950 <sup>a</sup> | 1  | ,000                  |                      |                      |
| Continuity Correction <sup>b</sup> | 39,640              | 1  | ,000                  |                      |                      |
| Likelihood Ratio                   | 26,719              | 1  | ,000                  |                      |                      |
| Fisher's Exact Test                |                     |    |                       | ,000                 | ,000                 |
| Linear-by-Linear Association       | 44,771              | 1  | ,000                  |                      |                      |
| N of Valid Cases                   | 251                 |    |                       |                      |                      |

Cho 2010

#### Chi-Square Tests

|                                    | Value              | df | Asymp. Sig. (2-sided) | Exact Sig. (2-sided) | Exact Sig. (1-sided) |
|------------------------------------|--------------------|----|-----------------------|----------------------|----------------------|
| Pearson Chi-Square                 | 3,893 <sup>a</sup> | 1  | ,048                  |                      |                      |
| Continuity Correction <sup>b</sup> | 2,670              | 1  | ,102                  |                      |                      |
| Likelihood Ratio                   | 3,368              | 1  | ,066                  |                      |                      |
| Fisher's Exact Test                |                    |    |                       | ,083                 | ,058                 |
| Linear-by-Linear Association       | 3,861              | 1  | ,049                  |                      |                      |
| N of Valid Cases                   | 121                |    |                       |                      |                      |

Catanescu 2016

#### Chi-Square Tests

|                                    | Value              | df | Asymp. Sig. (2-sided) | Exact Sig. (2-sided) | Exact Sig. (1-sided) |
|------------------------------------|--------------------|----|-----------------------|----------------------|----------------------|
| Pearson Chi-Square                 | 7,702 <sup>a</sup> | 1  | ,006                  |                      |                      |
| Continuity Correction <sup>b</sup> | 6,573              | 1  | ,010                  |                      |                      |
| Likelihood Ratio                   | 7,110              | 1  | ,008                  |                      |                      |
| Fisher's Exact Test                |                    |    |                       | ,010                 | ,006                 |
| Linear-by-Linear Association       | 7,658              | 1  | ,006                  |                      |                      |
| N of Valid Cases                   | 178                |    |                       |                      |                      |

Rajendran 2016

**Chi-Square Tests**

|                                    | Value               | df | Asymp. Sig. (2-sided) | Exact Sig. (2-sided) | Exact Sig. (1-sided) |
|------------------------------------|---------------------|----|-----------------------|----------------------|----------------------|
| Pearson Chi-Square                 | 37,857 <sup>a</sup> | 1  | ,000                  |                      |                      |
| Continuity Correction <sup>b</sup> | 36,170              | 1  | ,000                  |                      |                      |
| Likelihood Ratio                   | 32,293              | 1  | ,000                  |                      |                      |
| Fisher's Exact Test                |                     |    |                       | ,000                 | ,000                 |
| Linear-by-Linear Association       | 37,804              | 1  | ,000                  |                      |                      |
| N of Valid Cases                   | 719                 |    |                       |                      |                      |

Total

Supplementary Table: 2x2 Contingency tables indicating the association between type of rupture (Post-EVAR vs De Novo) and type of treatment (Endovascular vs Open), for each study and for the total number of patients.
